# Supplementary material
Source: HighWire-hosted journal article supplement (https://qdcxjkg.com/highwire/filestream/113084/field_highwire_adjunct_files/0/Table_A.pdf)
Supplement: Table_A.pdf [file Table_A.pdf]

| <b>Table A. Neighborhood Coefficients and Standard Errors*</b> |                              |                |                 |                |                 |                 |                 |
|----------------------------------------------------------------|------------------------------|----------------|-----------------|----------------|-----------------|-----------------|-----------------|
| <b>Variable</b>                                                | <b>Beta Coefficient (SE)</b> |                |                 |                |                 |                 |                 |
|                                                                | <b>1</b>                     | <b>2</b>       | <b>3</b>        | <b>4</b>       | <b>5</b>        | <b>6</b>        | <b>7</b>        |
| <b>Neighborhood Disadvantage</b>                               | 0.00<br>(0.01)               |                |                 | 0.00<br>(0.01) | 0.00<br>(0.01)  |                 | 0.00<br>(0.01)  |
| <b>Social Disorder</b>                                         |                              | 0.07<br>(0.20) |                 | 0.04<br>(0.24) |                 | -0.12<br>(0.27) | -0.16<br>(0.31) |
| <b>Collective Efficacy</b>                                     |                              |                | -0.22<br>(0.22) |                | -0.22<br>(0.24) | -0.31<br>(0.30) | -0.31<br>(0.30) |

\*All models adjust for individual-level variables
